# Supplementary material
Source: publisher figshare collection journal article supplement (https://sage.figshare.com/ndownloader/files/15006293)
Supplement: Supplementary file 1 [file 15006293]

Appendix A  
Survey Questions

**History**

1. What is the name of your air quality management program? \_\_\_\_\_
2. What year was the Air Quality Management Program established?  
\_\_\_\_\_
  - What were the primary drivers behind the initiation of the Program?
  - Mobile sources, please explain \_\_\_\_\_
  - Stationary sources, please explain \_\_\_\_\_
  - Land use, please explain \_\_\_\_\_
  - Transportation, please explain \_\_\_\_\_
  - State policies, please explain \_\_\_\_\_
  - Community concerns, please explain \_\_\_\_\_
  - Other, please explain \_\_\_\_\_
3. Was the design of the Program modeled after another air quality management program?
  - Yes
  - No
  - Explanation (i.e., what program?): \_\_\_\_\_
4. Does the Program have a written Air Quality Management Plan (formal or informal)?
  - Yes
  - No
  - Additional information: \_\_\_\_\_

**Program Structure**

5. Please describe the organizational structure of the Program (check all that apply).
  - Executive director
  - Advisory council
  - Board of Directors
  - Control board
  - Other/Supplementary information:  
\_\_\_\_\_
6. What is the annual budget of the program?
7. Number of full-time equivalent (FTE) employees in the program:  
\_\_\_\_\_
8. Please identify the major divisions of the Program (check all that apply) and write the approximate percentage of the total employees working in each division.

| <b>Division</b>  | <b>Staff</b> |
|------------------|--------------|
| Administrative   | _____        |
| Executive Office | _____        |
| Compliance       | _____        |

|                        |       |
|------------------------|-------|
| Engineering            | _____ |
| Planning               | _____ |
| Monitoring             | _____ |
| Permitting             | _____ |
| Enforcement            | _____ |
| Education and Outreach | _____ |
| Other: _____           | _____ |
| Other: _____           | _____ |
| Other: _____           | _____ |
| Total:                 | 100%  |

9. What is the approximate annual revenue of the program? \_\_\_\_\_

10. Please identify the primary revenue sources of the program (check all that apply) and write the approximate percentage of the total revenue stream contributed by each source.

| Revenue Source                        | Percent of Total Revenue Stream |
|---------------------------------------|---------------------------------|
| Permit fees                           | _____                           |
| Federal funds                         | _____                           |
| State funds                           | _____                           |
| County funds                          | _____                           |
| Local taxes                           | _____                           |
| US EPA                                | _____                           |
| State environmental protection agency | _____                           |
| Enforcement fines                     | _____                           |
| Other: _____                          | _____                           |
| Other: _____                          | _____                           |
| Other: _____                          | _____                           |
| Total:                                | 100%                            |

11. Please identify the primary expenditures of the program (check all that apply) and write the approximate percentage of the total budget contributed by each.

| Primary Expenditures            | Percent of Total Budget |
|---------------------------------|-------------------------|
| Salaries and benefits           | _____                   |
| Equipment and maintenance       | _____                   |
| Operating supplies and services | _____                   |
| Other: _____                    | _____                   |
| Other: _____                    | _____                   |
| Other: _____                    | _____                   |
| Total:                          | 100%                    |

### Regulations and Enforcement

12. Is air quality considered in (check all that apply):

- Local transportation policy; please explain: \_\_\_\_\_
  - Local land use policy; please explain: \_\_\_\_\_
  - Other: \_\_\_\_\_
13. What mechanisms are employed by the program to address air quality (select all that apply)?
- Non-regulatory mechanisms
  - Regulatory mechanisms
  - Other
14. What are the primary pollutants of concern to which regulations/mechanisms are designed to address (select all that apply)?
- All criteria pollutants
  - Carbon monoxide
  - Lead
  - Nitrogen dioxide
  - Oxone
  - Particulates
  - Sulfur dioxide
  - Toxic (aka 'hazardous') air pollutants
  - Other(s): \_\_\_\_\_

>>If Non-Regulatory<<

15. Please identify the type of **non-regulatory** mechanism(s) employed (check all that apply):
- Education and outreach
  - Citizen complaint program
  - Economic incentives
  - Policy advocacy
  - Specialized studies
  - Others: \_\_\_\_\_
16. Please identify the focus of the **non-regulatory** mechanisms employed:
- Mobile sources (e.g., clean and efficient transportation)
  - Stationary sources - Residential (e.g., home energy use, heating fuel, etc.)
  - Stationary sources – Business
  - Stationary sources – Industry
  - Others: \_\_\_\_\_

17. Additional information about non-regulatory mechanisms employed: \_\_\_\_\_

>>If Regulatory<<

18. To what extent are the regulations enforced by the program to address specific air pollutants more stringent than federal regulations (e.g., Clean Air Act) and those set by your state?

| Air Pollutants          | Federal Regulations | State Regulations |
|-------------------------|---------------------|-------------------|
|                         | N/A                 | N/A               |
| All Criteria Pollutants | Lower Than          | Lower Than        |
|                         | Stronger Than       | Stronger Than     |
|                         | Consistent With     | Consistent With   |

|                                              |                                                       |                                                       |
|----------------------------------------------|-------------------------------------------------------|-------------------------------------------------------|
| Carbon Monoxide                              | N/A<br>Lower Than<br>Stronger Than<br>Consistent With | N/A<br>Lower Than<br>Stronger Than<br>Consistent With |
| Lead                                         | N/A<br>Lower Than<br>Stronger Than<br>Consistent With | N/A<br>Lower Than<br>Stronger Than<br>Consistent With |
| Nitrogen Dioxide                             | N/A<br>Lower Than<br>Stronger Than<br>Consistent With | N/A<br>Lower Than<br>Stronger Than<br>Consistent With |
| Ozone                                        | N/A<br>Lower Than<br>Stronger Than<br>Consistent With | N/A<br>Lower Than<br>Stronger Than<br>Consistent With |
| Particulates                                 | N/A<br>Lower Than<br>Stronger Than<br>Consistent With | N/A<br>Lower Than<br>Stronger Than<br>Consistent With |
| Sulfur Dioxide                               | N/A<br>Lower Than<br>Stronger Than<br>Consistent With | N/A<br>Lower Than<br>Stronger Than<br>Consistent With |
| Toxic (aka<br>'hazardous') air<br>pollutants | N/A<br>Lower Than<br>Stronger Than<br>Consistent With | N/A<br>Lower Than<br>Stronger Than<br>Consistent With |
| Other: _____                                 | N/A<br>Lower Than<br>Stronger Than<br>Consistent With | N/A<br>Lower Than<br>Stronger Than<br>Consistent With |
| Other: _____                                 | N/A<br>Lower Than<br>Stronger Than<br>Consistent With | N/A<br>Lower Than<br>Stronger Than<br>Consistent With |
| Other: _____                                 | N/A<br>Lower Than<br>Stronger Than<br>Consistent With | N/A<br>Lower Than<br>Stronger Than<br>Consistent With |

19. What entities are regulated?

- Residential emissions
- Industrial emissions
- Emissions from businesses
- Automobile emissions
- Marine emissions
- Other: \_\_\_\_\_

20. How are Program rules and regulations enforced? (check all that apply)

- Permits
- Inspections; How often? \_\_\_\_\_
- Issuance of violations
- Penalties (financial); how much? \_\_\_\_\_
- Other: \_\_\_\_\_

>>If Other<<

21. Please briefly describe other mechanisms employed by the Program to address air quality: \_\_\_\_\_

### Program Effectiveness

22. How do you measure Program effectiveness? \_\_\_\_\_

23. Our Program has effectively improved local air quality already:

|          |          |   |   |          |
|----------|----------|---|---|----------|
| 1        | 2        | 3 | 4 | 5        |
| Strongly | Disagree |   |   | Strongly |
| Agree    |          |   |   |          |

24. By 2025 air quality in our region will be better than at present as a result of our Program:

|          |          |   |   |          |
|----------|----------|---|---|----------|
| 1        | 2        | 3 | 4 | 5        |
| Strongly | Disagree |   |   | Strongly |
| Agree    |          |   |   |          |

25. Our Program effectively mitigates disproportionate exposure to historically impacted communities:

|          |          |   |   |          |
|----------|----------|---|---|----------|
| 1        | 2        | 3 | 4 | 5        |
| Strongly | Disagree |   |   | Strongly |
| Agree    |          |   |   |          |

26. How could your program be improved to better protect regional air quality?

\_\_\_\_\_

### Other

27. Would you be willing to discuss your Program in greater detail with the researchers in a phone interview?

- Yes
- No

28. If yes, please provide a phone number to reach you to schedule an interview:

\_\_\_\_\_

29. Additional information, concerns, or comments: \_\_\_\_\_
